# Supplementary material for: Baseline Hedgehog Pathway Activation and Increase of Plasma Wnt1 Protein Are Associated with Resistance to Immune Checkpoint Inhibitors in Advanced Non-Small-Cell Lung Cancer
Source: PubMed Central journal article supplement (PMC7962040; doi:10.3390/cancers13051107), 2021-03-05
Supplement: cancers-13-01107-s001.pdf [file cancers-13-01107-s001.pdf]

**Table S1.** Characteristics of patients included with available Gli1 expression.

| Characteristics                                           | Population with available Gli1 expression<br>n= 36 |
|-----------------------------------------------------------|----------------------------------------------------|
| <b>Age at the introduction of ICI (year-old)</b>          |                                                    |
| Median                                                    | 67.5                                               |
| Range                                                     | 62.5-72.2                                          |
| <b>Female sex</b>                                         | 17 (47.2%)                                         |
| <b>Smoking status</b>                                     |                                                    |
| Current                                                   | 11 (30.5%)                                         |
| Former                                                    | 22 (61.1%)                                         |
| Never                                                     | 3 (8.3%)                                           |
| <b>Histology</b>                                          |                                                    |
| Non squamous                                              | 24 (66.7%)                                         |
| Squamous                                                  | 7 (19.4%)                                          |
| Other                                                     | 5 (13.9%)                                          |
| <b>Molecular alteration at the diagnostic</b>             |                                                    |
| <i>KRAS</i> mutation                                      | 12 (33.3%)                                         |
| <i>BRAF</i> mutation                                      | 2 (5.5%)                                           |
| <i>EGFR</i> mutation                                      | 1 (2.8%)                                           |
| <i>MET</i> amplification                                  | 0 (0.0%)                                           |
| No alteration                                             | 21 (58.3%)                                         |
| <b>ECOG performance-status at the introduction of ICI</b> |                                                    |
| 0-1                                                       | 23 (63.9%)                                         |
| 2                                                         | 13 (36.1%)                                         |
| <b>Type of ICI and number of lines before ICI</b>         |                                                    |
| Pembrolizumab                                             | 12 (33.3%)                                         |
| - First line                                              | 12 (33.3%)                                         |
| - Second line and more                                    | 0 (0.0%)                                           |
| Nivolumab                                                 | 24 (66.7%)                                         |
| - First line                                              | 0 (0)                                              |
| - Second line and more                                    | 24 (66.7%)                                         |

Data are expressed as n (%), although otherwise specified

**Table S2.** OS and PFS according to plasmatic concentrations of Wnt1, Wnt2, Wnt3, or Shh at introduction of the ICI or at the first evaluation.

|             |                  | OS (months)            |                        |      | PFS (months)          |                      |      |
|-------------|------------------|------------------------|------------------------|------|-----------------------|----------------------|------|
|             |                  | High expression        | Low expression         | p    | High expression       | Low expression       | p    |
| <b>Shh</b>  | Introduction     | 23.2<br>(IQR 6.1-50.3) | 15.3<br>(IQR 5.9-35.6) | 0.45 | 3.7<br>(IQR 1.8-10.5) | 3.4<br>(IQR 1.0-9.8) | 0.14 |
|             | First evaluation | 35.6<br>(IQR 13.7-NR)  | 16.2<br>(IQR 5.9-34.6) | 0.03 | 7.9<br>(IQR 4.1-23.0) | 3.4<br>(1.6-16.2)    | 0.15 |
| <b>Wnt1</b> | Introduction     | 35.3<br>(IQR 6.1-50.3) | 15.6<br>(IQR 6.2-28.3) | 0.11 | 1.7<br>(IQR 1.1-11.9) | 3.8<br>(2.8-8.5)     | 0.69 |
|             | First evaluation | 28.4<br>(IQR 6.1-NR)   | 19.1<br>(7.5-NR)       | 0.92 | 2.8<br>(IQR 1.6-11.9) | 2.1<br>(IQR 1.6-3.9) | 0.36 |
| <b>Wnt2</b> | Introduction     | 21.2                   | 15.3                   | 0.96 | 3.4                   | 5.5                  | 0.70 |

|             |                  |                 |                |      |                |                |      |
|-------------|------------------|-----------------|----------------|------|----------------|----------------|------|
|             |                  | (IQR 4.5-50.3)  | (IQR 9.8-35.6) |      | (IQR1.6-9.8)   | (IQR 1.6-11.9) |      |
|             | First evaluation | 28.3            | 16.2           | 0.99 | 4.9            | 4.5            | 0.08 |
|             |                  | (IQR 10.2-35.3) | (IQR5.8-NR)    |      | (IQR 3.1-24.2) | (IQR 1.6-10.5) |      |
| <b>Wnt3</b> | Introduction     | 21.2            | 15.3           | 0.90 | 3.5            | 3.6            | 0.77 |
|             |                  | (IQR 5.9-NR)    | (IQR 6.2-50.3) |      | (IQR 1.6-10.5) | (IQR 1.6-9.8)  |      |
|             | First evaluation | 28.4            | 13.7           | 0.78 | 10.5           | 3.5            | 0.09 |
|             |                  | (IQR 16.2-35.6) | (IQR 6.1-NR)   |      | (IQR 3.1-24.2) | (IQR 1.7-7.9)  |      |

IQR: Interquartile Range; NR: not reached

**Table S3.** Tumor response and primary resistance according to the presence of an increase of Shh, Wnt1, Wnt2, Wnt3 concentrations between the introduction of the ICI and the first evaluation.

|      |             | n  | ORR (n; %) | p    | Primary resistance (n ; %) | p    |
|------|-------------|----|------------|------|----------------------------|------|
| Shh  | increase    | 12 | 5 (41.6)   | 0.24 | 3 (27.3)                   | 0.64 |
|      | no increase | 19 | 12 (63.1)  |      | 4 (20.0)                   |      |
| Wnt1 | increase    | 19 | 8 (42.1)   | 0.39 | 6 (31.6)                   | 0.25 |
|      | no increase | 14 | 8 (57.1)   |      | 2 (14.3)                   |      |
| Wnt2 | increase    | 20 | 8 (40.0)   | 0.23 | 6 (30.0)                   | 0.34 |
|      | no increase | 13 | 8 (61.5)   |      | 2 (15.4)                   |      |
| Wnt3 | increase    | 19 | 10 (52.6)  | 0.71 | 5 (27.8)                   | 0.6  |
|      | no increase | 14 | 7 (50.0)   |      | 3 (20.0)                   |      |

ORR: overall response rate;

**Table S4.** List of probes used to analyze relative expression of Gli1 target genes. All primers were commercially acquired from ThermoFisher Scientifici (France).

| Genes       | Taqman probes  |
|-------------|----------------|
| <i>GLI1</i> | Hs011110773_g1 |
| <i>HHIP</i> | Hs01011015_m1  |
| <i>PTCH</i> | Hs00288486_m1  |
| <i>JAG2</i> | Hs00171432_m1  |
| <i>ACTB</i> | Hs99999903_m1  |

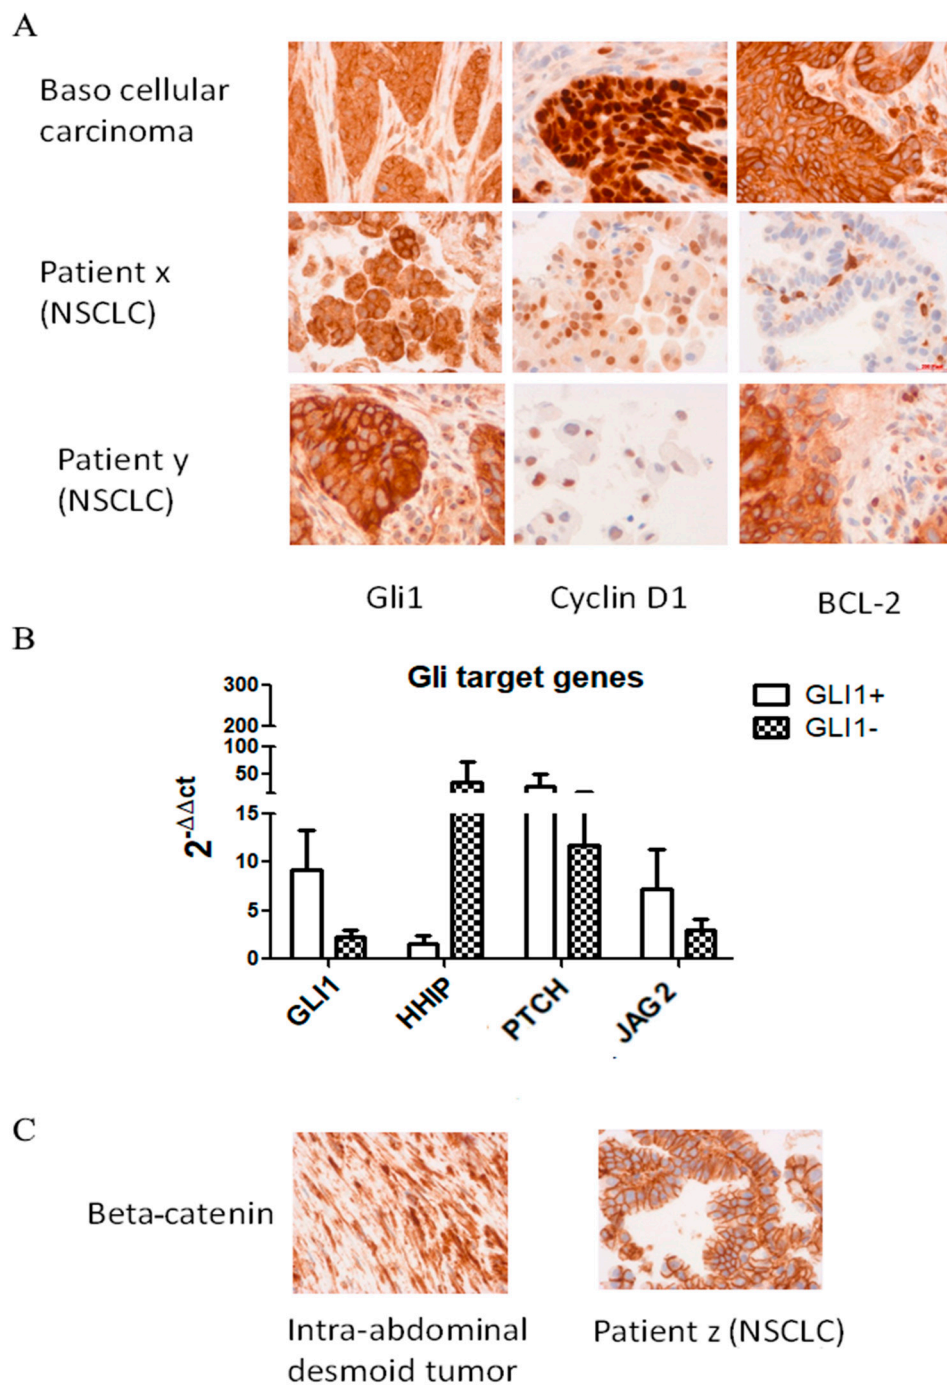

**Figure S1.** (A) Shh/Gli1 activation in NSCLC samples as assessed by Immunohistochemistry analysis of Gli1 and Gli1 target genes Cyclin D1 and BCL-2. Patients X and Y are representative of Gli1+ patients (18/36); the Basocellular sample was used as positive control. (B) mRNA expression of Gli1 target genes in NSCLC, data are expressed as mean  $\pm$  SEM of 7 patients analyzed in duplicate. (C) Beta-catenin expression in NSCLC as assessed by Immunohistochemistry. Patient z is representative of the whole population (n = 36). The Intra-abdominal desmoid tumor is used as positive control.
